# Supplementary material for: Reliability of Tibialis Anterior Muscle Voluntary Activation Using the Interpolated Twitch Technique and the Central Activation Ratio in People with Stroke
Source: PubMed Central journal article supplement (PMC7912757; doi:10.3390/brainsci11020176), 2021-02-01
Supplement: brainsci-11-00176-s001.pdf [file brainsci-11-00176-s001.pdf]

# Reliability Analysis

Usman Rashid

13/04/2020

## Contents

|          |                                                              |           |
|----------|--------------------------------------------------------------|-----------|
| <b>1</b> | <b>Statistical Analysis Plan</b>                             | <b>2</b>  |
| <b>2</b> | <b>Summary Statistics</b>                                    | <b>3</b>  |
| 2.1      | Data Variables . . . . .                                     | 3         |
| 2.2      | Normality Test . . . . .                                     | 3         |
| 2.3      | ICC Calculations . . . . .                                   | 3         |
| 2.3.1    | Reliability on the Original Scale . . . . .                  | 3         |
| 2.3.2    | Non-parametric Concordance Correlation Coefficient . . . . . | 4         |
| 2.3.3    | Reliability on the Arcsin Transformed Scale . . . . .        | 4         |
| 2.3.3.1  | Goodness-of-the-fit plots for the Model . . . . .            | 5         |
|          | <b>References</b>                                            | <b>11</b> |

# 1 Statistical Analysis Plan

Data is imported into R (R Core Team, 2018) for reliability analysis. The normality of the variables is checked with Shapiro-Wilk test. For variables which are normally distributed, a linear mixed model with Gaussian distribution and identity link is setup to estimate between-participant ( $\sigma_p^2$ ), between-test ( $\sigma_t^2$ ) and error (within-participant,  $\sigma_\epsilon^2$ ) variance using the *rptR* package (Stoffel, Nakagawa, & Schielzeth, 2017). An ICC for test-retest reliability with absolute agreement using single measures is calculated as described in the following equation (Koo & Li, 2016). The confidence interval for the ICC is constructed using 1000 parametric bootstraps.

$$ICC(A, 1) = \frac{\sigma_p^2}{\sigma_p^2 + \sigma_t^2 + \sigma_\epsilon^2} \quad (1)$$

Variables which fail the normality test, two analyses are conducted. First, for an estimate of the ICC on the original scale, a generalised linear mixed model is setup with Gamma distribution and identity link using the *lme4* package (Bates, Mächler, Bolker, & Walker, 2015). In addition to location (mean) and scale (variance) parameters, Gamma distribution also has a shape parameter allowing it to better fit skewed data.  $ICC(A, 1)$  is estimated using the methodology described by Nakagawa, Johnson, & Schielzeth (2017) where observation-level variance is substituted for error variance ( $\sigma_\epsilon^2$ ) in equation 1. The observation-level variance is estimated from the fitted model as follows:

$$\sigma_\epsilon^2 = \frac{\beta_0^2}{\nu} \quad (2)$$

where  $\beta_0$  is the overall intercept in the fitted model and  $\nu$  is the shape parameter of the fitted Gamma distribution. In the cases where Gamma distribution cannot be used to fit the data, a non-parametric measure of reliability is computed with Lin's concordance correlation coefficient (Steichen & Cox, 2002), (Lawrence & Lin, 1989). The concordance coefficient quantifies the deviation of the observed data from the line of perfect concordance (a line at 45°).

Second, arcsin transformation is used when possible to bring the variable closer to normality.  $ICC(A, 1)$  is calculated on the transformed scale using the same procedure described earlier for normal data. The fitness of model to the data is evaluated using QQ-plot and residuals versus fitted values plot.

*Discussion:* The limitation of the transformed scale is that it is generally harder to interpret although it allows application of traditional ANOVAs which assume normality of the data for statistical inference. The advantage of reporting reliability for both the transformed scale and the original scale using two different approaches is that future researchers can choose the scale which better suits their needs.

## 2 Summary Statistics

### 2.1 Data Variables

```
## 'data.frame': 24 obs. of 13 variables:
## $ PID : Factor w/ 12 levels "1","2","3","4",...: 1 2 3 4 5 6 7 8 9 10 ...
## $ Test : Factor w/ 2 levels "1","2": 1 1 1 1 1 1 1 1 1 1 ...
## $ ITT_1 : num 84 59.1 100 85.5 93.6 ...
## $ ITTAdj_1 : num 84.4 67.2 100 88.3 94.4 ...
## $ CAR_1 : num 97.5 86.3 100 98.7 98.7 ...
## $ ITT_2 : num 57.1 50.2 91.1 81.4 34 ...
## $ CAR_2 : num 89.2 86.6 97.5 98.6 57 ...
## $ CF_ITT : num 26.95 8.91 8.91 4.1 59.54 ...
## $ CF_CAR : num 8.2241 -0.3125 2.4516 0.0752 41.7339 ...
## $ Rest_Tw_AMP_1: num 42.6 24.2 25.6 21 30.9 ...
## $ Sup_Tw_AMP_1 : num 6.81 9.91 0 3.05 1.99 ...
## $ Sup_Tw_AMP_2 : num 17.39 10.28 2 3.17 21.74 ...
## $ Rest_Tw_AMP_2: num 40.5 20.6 22.5 17 32.9 ...
```

### 2.2 Normality Test

| Variable      | W.statistic | P.Value   | Sig.  |
|---------------|-------------|-----------|-------|
| ITT_1         | 0.7566365   | 0.0000624 | TRUE  |
| ITTAdj_1      | 0.7668580   | 0.0000887 | TRUE  |
| CAR_1         | 0.6324977   | 0.0000015 | TRUE  |
| ITT_2         | 0.8798619   | 0.0082571 | TRUE  |
| CAR_2         | 0.7325573   | 0.0000280 | TRUE  |
| CF_ITT        | 0.9634983   | 0.5126192 | FALSE |
| CF_CAR        | 0.7745614   | 0.0001163 | TRUE  |
| Rest_Tw_AMP_1 | 0.9603490   | 0.4454757 | FALSE |
| Sup_Tw_AMP_1  | 0.7904843   | 0.0002067 | TRUE  |
| Rest_Tw_AMP_2 | 0.9657427   | 0.5639649 | FALSE |
| Sup_Tw_AMP_2  | 0.8989557   | 0.0204552 | TRUE  |

### 2.3 ICC Calculations

#### 2.3.1 Reliability on the Original Scale

Fitting a model with Gamma distribution is not possible for ITT\_2 and Sup\_Tw\_AMP\_1 as these contain 0 or negative values. For CF\_ITT and CF\_CAR, the models failed to converge with a non-negative between-participant variance.

*Note:* The SEMs presented in the below table are on the original scale.

| Variable      | Model    | ICC  | CI.lower | CI.upper | SEM   |
|---------------|----------|------|----------|----------|-------|
| ITT_1         | Gamma    | 61.5 | 25.4     | 73.8     |       |
| ITTAdj_1      | Gamma    | 62.2 | 30.3     | 74.1     |       |
| CAR_1         | Gamma    | 82.1 | 63.1     | 90.7     |       |
| CAR_2         | Gamma    | 32.6 | -23.3    | 51.0     |       |
| Rest_Tw_AMP_1 | Gaussian | 57.0 | 6.6      | 85.6     | 6.607 |
| Rest_Tw_AMP_2 | Gaussian | 72.7 | 31.0     | 91.9     | 5.160 |
| Sup_Tw_AMP_2  | Gamma    | 35.4 | 5.0      | 44.7     |       |

### 2.3.2 Non-parametric Concordance Correlation Coefficient

Negative values for reliability suggest that the participants are more different than the average similarity level obtained from random measurements (Stoffel et al., 2017). In other words, negative values are an evidence of zero (poor) reliability.

| Variable     | CCC   | CI.lower | CI.upper |
|--------------|-------|----------|----------|
| ITT_2        | 39.3  | -11.0    | 73.5     |
| CF_ITT       | -21.5 | -68.3    | 37.8     |
| CF_CAR       | -4.1  | -56.8    | 50.9     |
| Sup_Tw_AMP_1 | 76.6  | 38.0     | 92.5     |

### 2.3.3 Reliability on the Arcsin Transformed Scale

The variables are transformed as follows (Warton & Hui, 2011):

$$X_t = \text{asin}\left(\sqrt{\frac{X_o}{100}}\right) \quad (3)$$

Arcsin transformation is not possible for ITT\_2, CF\_ITT and CF\_CAR as these variables contain negative values for which arcsin is not defined.

*Note:* The SEMs presented in the below table are for the transformed scale.

| Variable     | ICC  | CI.lower | CI.upper | SEM   |
|--------------|------|----------|----------|-------|
| ITT_1        | 82.2 | 53.3     | 93.7     | 0.117 |
| ITTAdj_1     | 82.2 | 51.1     | 94.3     | 0.105 |
| CAR_1        | 92.4 | 77.1     | 97.6     | 0.039 |
| CAR_2        | 48.3 | 0.0      | 81.6     | 0.153 |
| Sup_Tw_AMP_1 | 83.1 | 54.7     | 94.9     | 0.053 |
| Sup_Tw_AMP_2 | 64.7 | 19.2     | 87.9     | 0.082 |

### 2.3.3.1 Goodness-of-the-fit plots for the Model

Arcsin transformed CAR\_2 has a larger number of outliers compared to the other measures.

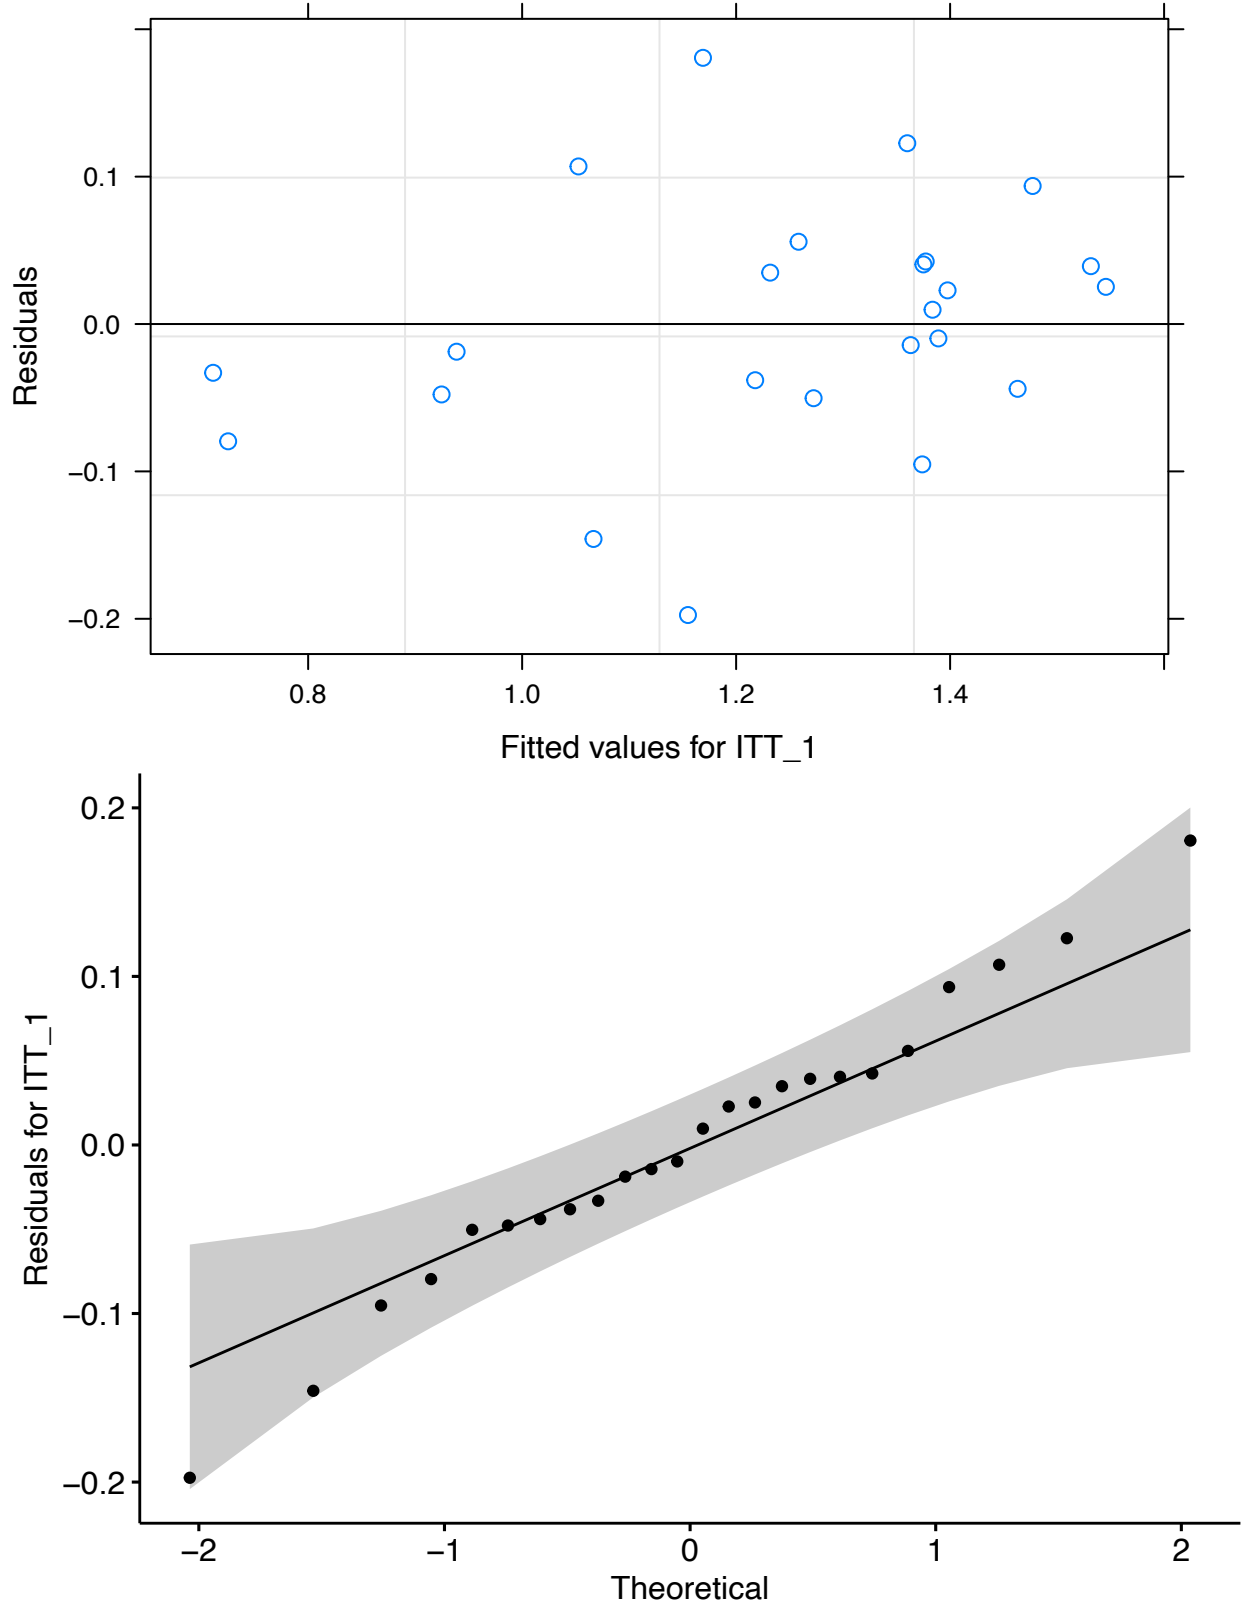

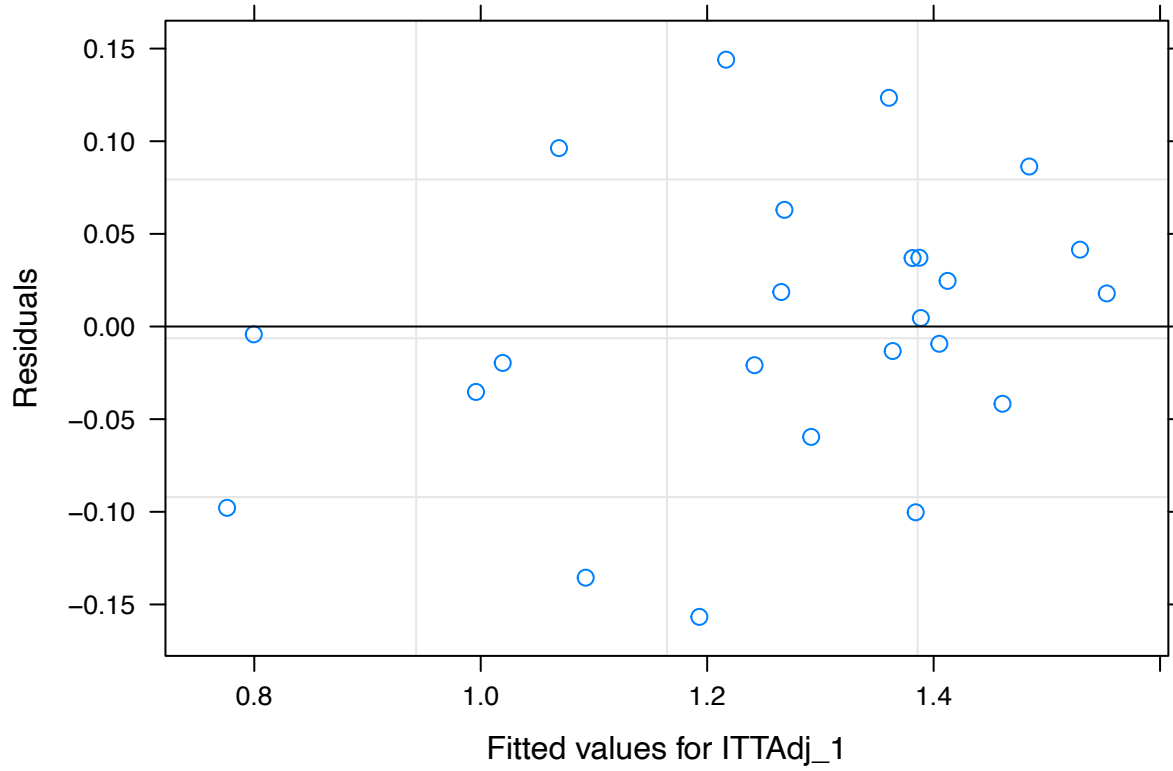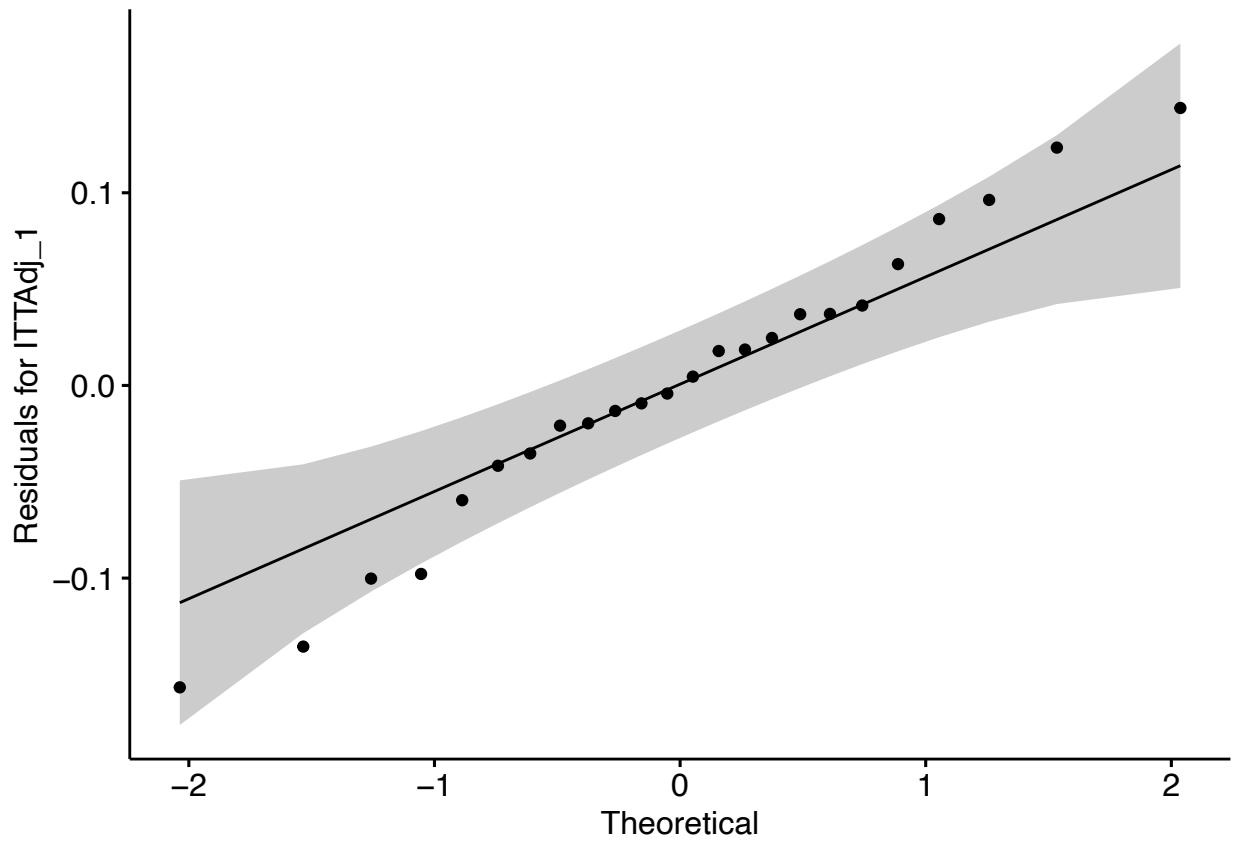

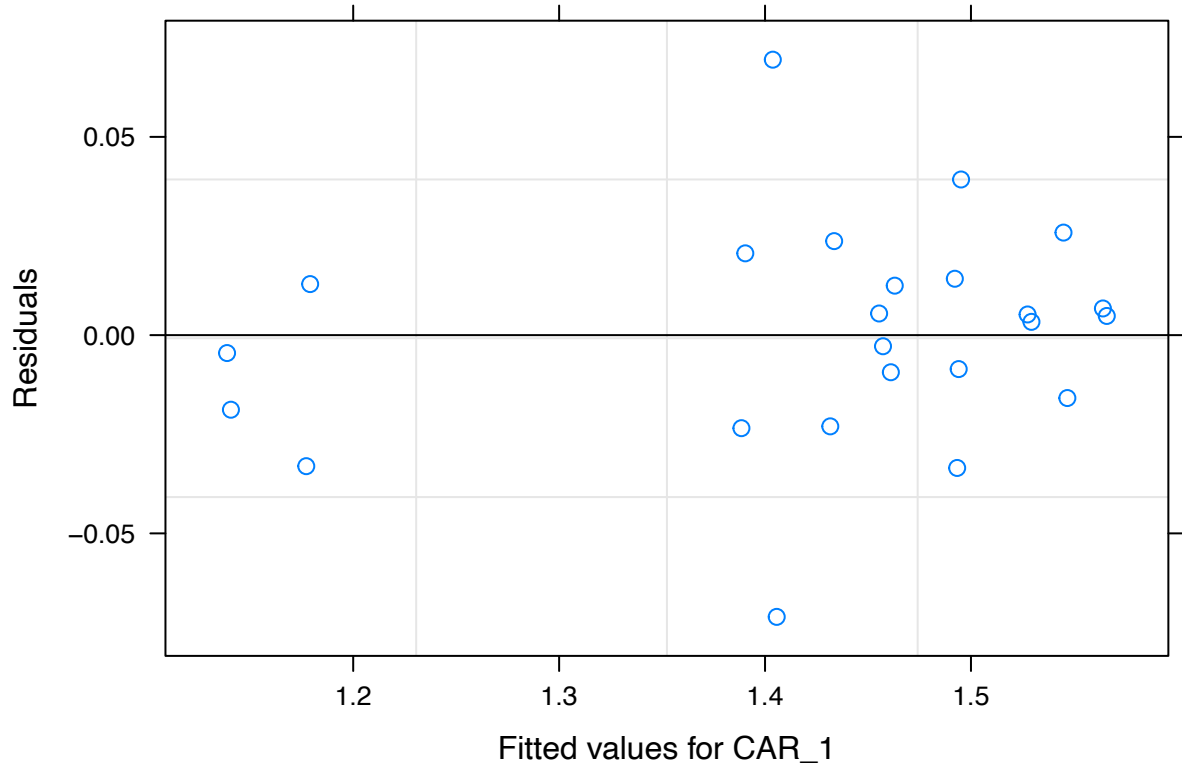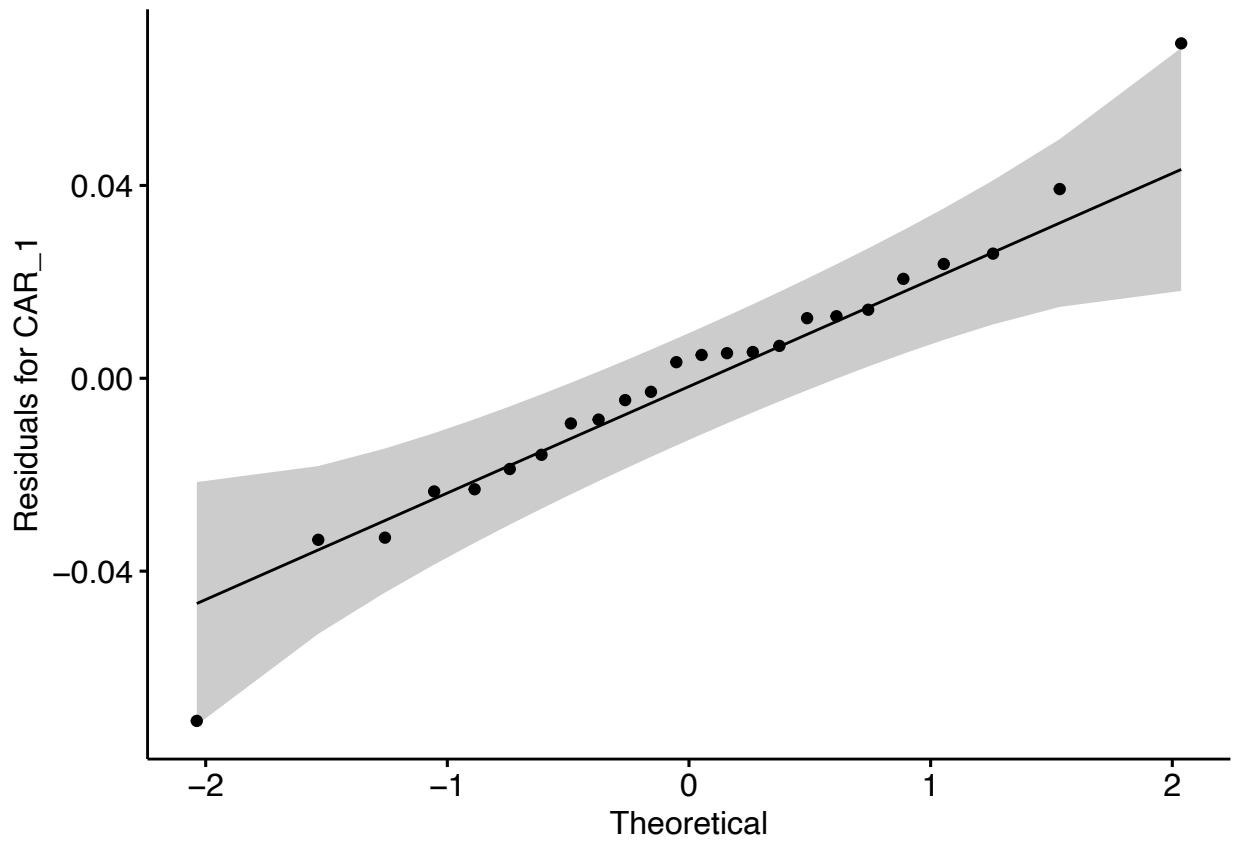

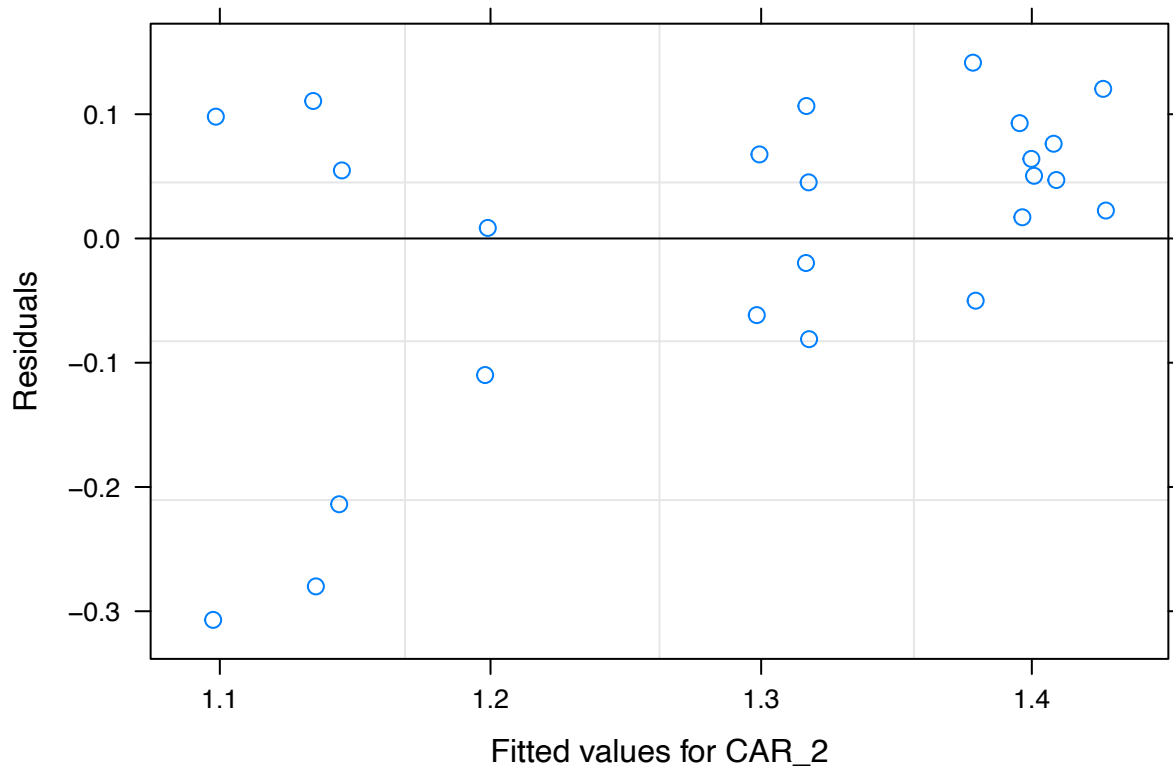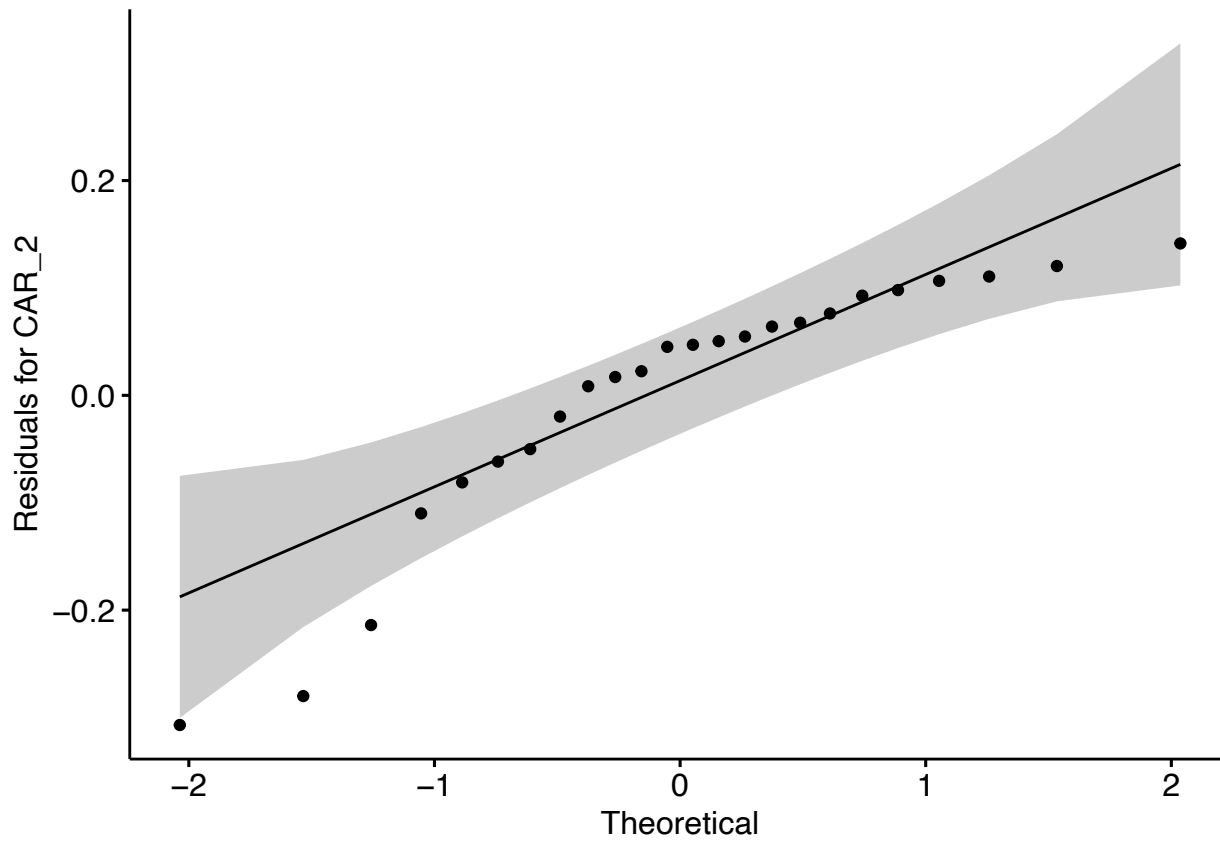



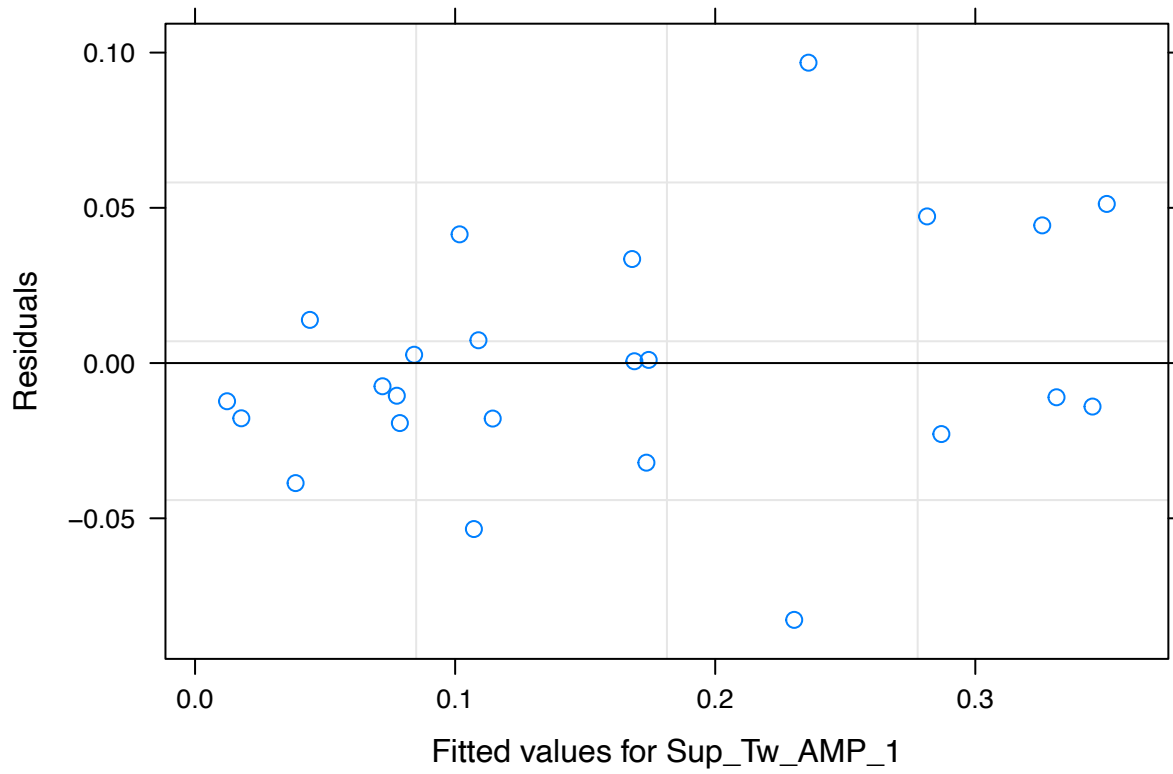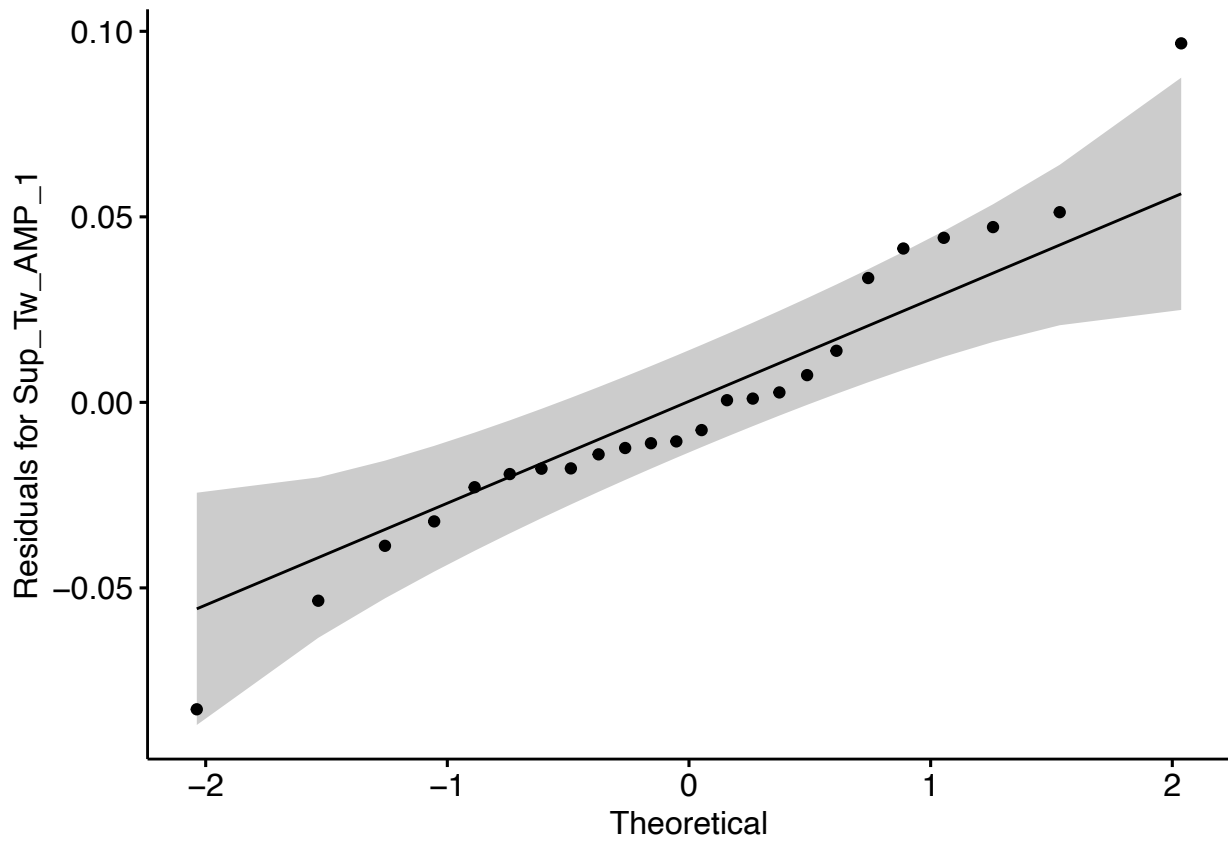

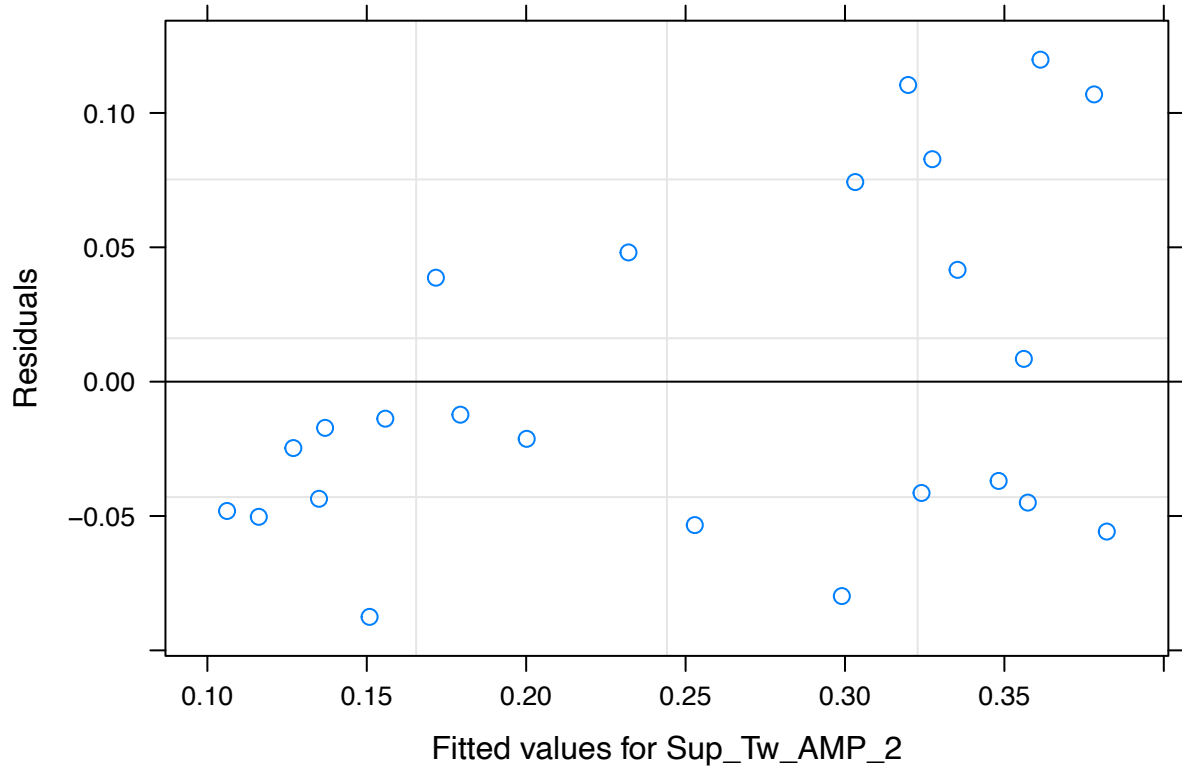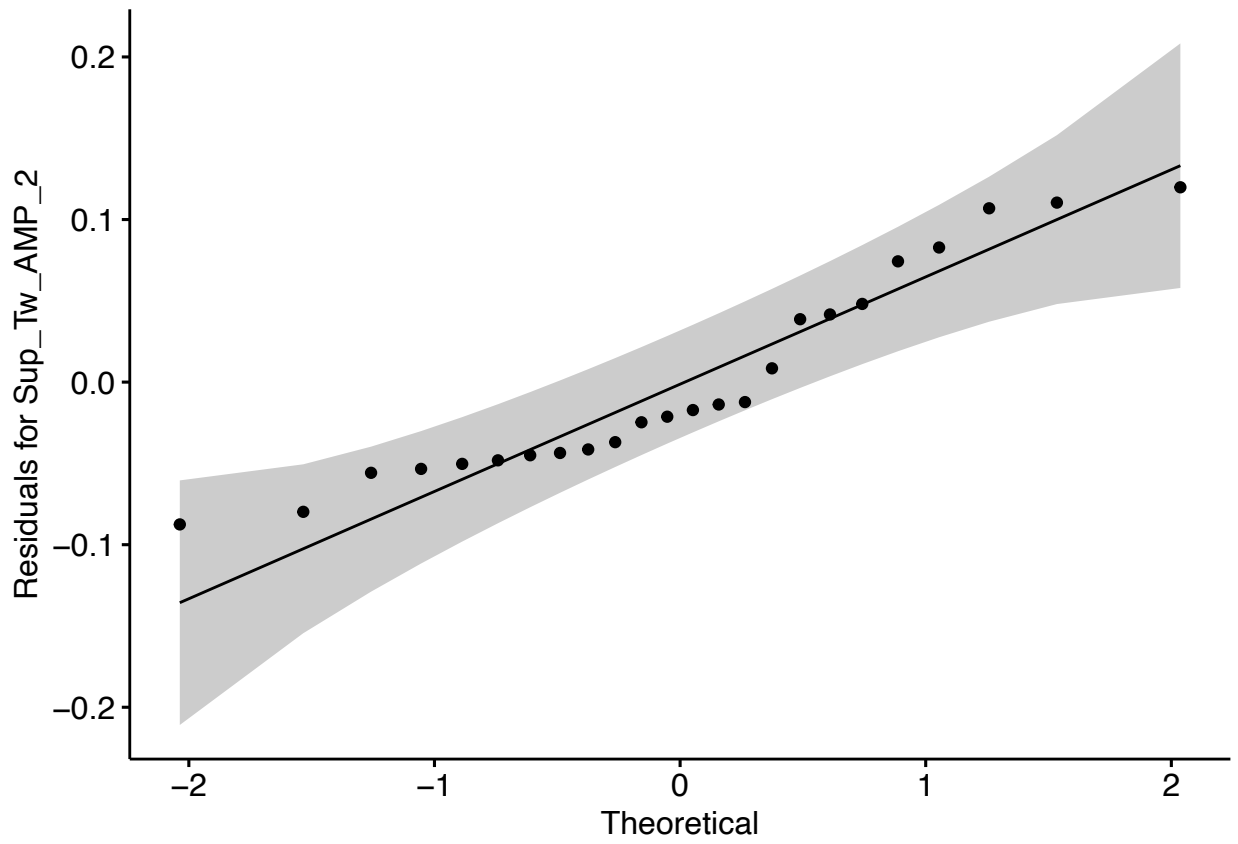

## References

- Bates, D., Mächler, M., Bolker, B., & Walker, S. (2015). Fitting linear mixed-effects models using lme4. *Journal of Statistical Software*, *67*(1), 1–48. <https://doi.org/10.18637/jss.v067.i01>
- Koo, T. K., & Li, M. Y. (2016). A guideline of selecting and reporting intraclass correlation coefficients for reliability research. *Journal of Chiropractic Medicine*, *15*(2), 155–163.
- Lawrence, I., & Lin, K. (1989). A concordance correlation coefficient to evaluate reproducibility. *Biometrics*, 255–268.
- Nakagawa, S., Johnson, P. C., & Schielzeth, H. (2017). The coefficient of determination  $r^2$  and intra-class correlation coefficient from generalized linear mixed-effects models revisited and expanded. *Journal of the Royal Society Interface*, *14*(134), 20170213.
- R Core Team. (2018). *R: A language and environment for statistical computing*. Retrieved from <https://www.R-project.org/>
- Steichen, T. J., & Cox, N. J. (2002). A note on the concordance correlation coefficient. *The Stata Journal*, *2*(2), 183–189.
- Stoffel, M. A., Nakagawa, S., & Schielzeth, H. (2017). rptR: Repeatability estimation and variance decomposition by generalized linear mixed-effects models. *Methods in Ecology and Evolution*, *8*(11), 1639–1644. <https://doi.org/10.1111/2041-210X.12797>
- Warton, D. I., & Hui, F. K. (2011). The arcsine is asinine: The analysis of proportions in ecology. *Ecology*, *92*(1), 3–10.
